# Supplementary material for: Measurement report: Exchange fluxes of HONO over agricultural fields in the North China Plain
Source: Copernicus journal article supplement (doi:10.5194/acp-23-15733-2023), 2023-12-21
Supplement: Supplementary file 1 [file acp-23-15733-2023-supplement.pdf]

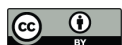

*Supplement of*

## **Measurement report: Exchange fluxes of HONO over agricultural fields in the North China Plain**

**Yifei Song et al.**

*Correspondence to:* Chaoyang Xue (ch.xue@mpic.de), Yuanyuan Zhang (yyzhang@rcees.ac.cn), and Yujing Mu (yjmu@rcees.ac.cn)

The copyright of individual parts of the supplement might differ from the article licence.

**Table S1. Statistical parameters for HONO fluxes at 12h intervals. PFP: pre-fertilization period (before June 18); HEP: high HONO emission period (from June 18 to July 10); LEP: low HONO emission period (after July 10).**

| Flux<br>(ng N m <sup>-2</sup> s <sup>-1</sup> ) | PFP   |       | HEP   |       | LEP   |       |
|-------------------------------------------------|-------|-------|-------|-------|-------|-------|
|                                                 | NP    | CK    | NP    | CK    | NP    | CK    |
| AVG                                             | 0.55  | -0.51 | 97.7  | -0.36 | 1.03  | -2.88 |
| SD <sup>a</sup>                                 | 0.35  | 0.13  | 8.6   | 0.04  | 3.17  | 2.41  |
| MAX <sup>b</sup>                                | 0.92  | 0.44  | 319   | 1.78  | 8.15  | 1.68  |
| MIN <sup>c</sup>                                | -0.05 | -1.65 | -1.14 | -3.29 | -5.52 | -8.55 |

a: SD represents the standard deviation between the three duplicates in parallel.

<sup>b, c</sup>: MAX and MIN represent the maximum and minimum values of the observed HONO flux at 12h intervals.

**Table S2. Summary of regional fertilizer-induced soil HONO emissions and related parameters in each province in China mainland in 2021.**

| Province     | TN <sup>a</sup><br>(1E4 t) | Crop area<br>(kha) | FAR <sup>b</sup><br>(kg N ha <sup>-1</sup> ) | F <sub>max-SF</sub> <sup>c</sup><br>(ng N m <sup>-2</sup> s <sup>-1</sup> ) | F <sub>max-DF</sub> <sup>d</sup><br>(ng N m <sup>-2</sup> s <sup>-1</sup> ) | EF<br>(%) | E <sub>HONO</sub> <sup>e</sup><br>(Gg N yr <sup>-1</sup> ) |
|--------------|----------------------------|--------------------|----------------------------------------------|-----------------------------------------------------------------------------|-----------------------------------------------------------------------------|-----------|------------------------------------------------------------|
| Beijing      | 2.9                        | 118                | 245.5                                        | 341.2                                                                       | 208.1                                                                       | 0.46      | 0.1                                                        |
| Tianjin      | 6.5                        | 437                | 149.6                                        | 115.7                                                                       | 70.6                                                                        | 0.26      | 0.2                                                        |
| Hebei        | 126.6                      | 8,097              | 156.4                                        | 125.5                                                                       | 76.5                                                                        | 0.27      | 3.4                                                        |
| Shanxi       | 35.0                       | 3,588              | 97.5                                         | 59.7                                                                        | 36.4                                                                        | 0.20      | 0.7                                                        |
| Neimenggu    | 106.9                      | 8,743              | 122.3                                        | 82.6                                                                        | 50.4                                                                        | 0.23      | 2.4                                                        |
| Liaoning     | 59.6                       | 4,329              | 137.8                                        | 100.3                                                                       | 61.1                                                                        | 0.24      | 1.5                                                        |
| Jilin        | 78.9                       | 6,187              | 127.5                                        | 88.2                                                                        | 53.8                                                                        | 0.23      | 1.8                                                        |
| Heilongjiang | 94.2                       | 15,065             | 62.5                                         | 35.7                                                                        | 21.8                                                                        | 0.19      | 1.8                                                        |
| Shanghai     | 3.3                        | 264                | 124.6                                        | 85.1                                                                        | 51.9                                                                        | 0.23      | 0.1                                                        |
| Jiangsu      | 153.8                      | 7,514              | 204.7                                        | 218.1                                                                       | 133.0                                                                       | 0.36      | 5.5                                                        |
| Zhejiang     | 31.5                       | 2,015              | 156.4                                        | 125.5                                                                       | 76.5                                                                        | 0.27      | 0.8                                                        |
| Anhui        | 114.8                      | 8,887              | 129.2                                        | 90.2                                                                        | 55.0                                                                        | 0.23      | 2.7                                                        |
| Fujian       | 41.1                       | 1,652              | 248.9                                        | 353.9                                                                       | 215.8                                                                       | 0.48      | 2.0                                                        |
| Jiangxi      | 39.5                       | 5,673              | 69.7                                         | 40.0                                                                        | 24.4                                                                        | 0.19      | 0.8                                                        |
| Shandong     | 149.5                      | 10,949             | 136.5                                        | 98.8                                                                        | 60.2                                                                        | 0.24      | 3.6                                                        |
| Henan        | 243.1                      | 14,705             | 165.3                                        | 139.3                                                                       | 85.0                                                                        | 0.28      | 6.9                                                        |
| Hubei        | 118.4                      | 8,109              | 146.0                                        | 110.9                                                                       | 67.6                                                                        | 0.25      | 3.0                                                        |
| Hunan        | 91.8                       | 8,504              | 107.9                                        | 68.6                                                                        | 41.9                                                                        | 0.21      | 2.0                                                        |
| Guangdong    | 94.6                       | 4,498              | 210.3                                        | 232.3                                                                       | 141.7                                                                       | 0.37      | 3.5                                                        |
| Guangxi      | 91.1                       | 6,178              | 147.5                                        | 112.8                                                                       | 68.8                                                                        | 0.26      | 2.3                                                        |
| Hainan       | 15.2                       | 685                | 222.5                                        | 265.5                                                                       | 161.9                                                                       | 0.40      | 0.6                                                        |
| Chongqing    | 48.3                       | 3,409              | 141.7                                        | 105.1                                                                       | 64.1                                                                        | 0.25      | 1.2                                                        |
| Sichuan      | 98.4                       | 10,000             | 98.4                                         | 60.4                                                                        | 36.9                                                                        | 0.21      | 2.0                                                        |

|          |       |       |       |       |       |      |     |
|----------|-------|-------|-------|-------|-------|------|-----|
| Guizhou  | 37.5  | 5,423 | 69.1  | 39.6  | 24.1  | 0.19 | 0.7 |
| Yunnan   | 98.6  | 7,057 | 139.7 | 102.6 | 62.6  | 0.25 | 2.4 |
| Xizang   | 1.7   | 274   | 62.2  | 35.5  | 21.7  | 0.19 | 0.0 |
| Shaanxi  | 96.2  | 4,189 | 229.6 | 287.3 | 175.2 | 0.42 | 4.0 |
| Gansu    | 35.6  | 3,998 | 89.1  | 53.1  | 32.4  | 0.20 | 0.7 |
| Qinghai  | 2.4   | 584   | 41.2  | 24.8  | 15.1  | 0.20 | 0.0 |
| Ningxia  | 17.6  | 1,176 | 149.5 | 115.5 | 70.4  | 0.26 | 0.5 |
| Xinjiang | 115.4 | 6,387 | 180.7 | 166.4 | 101.5 | 0.31 | 3.6 |

<sup>a</sup>: total applied nitrogen amounts (nitrogen fertilizer amount+0.22×compound fertilizer amount). Data source: China Statistical Yearbooks 2022.

<sup>b</sup>: fertilizer application rate.  $FAR = TN/Crop\ area$

<sup>c</sup>: the maximum HONO flux under surface fertilization condition.  $F_{max-SF} = 29.54 \times \exp(FAR/98.04) - 20.17$ .

<sup>d</sup>: the maximum HONO flux under deep fertilization condition.  $F_{max-DF} = F_{max-SF} / 1.64$ .

<sup>e</sup>: emission factor of HONO relative to TN.  $EF = F_{max-DF} \times 0.68/372 \times 300/FAR$ .

<sup>f</sup>: the regional fertilizer-induced soil HONO emissions.  $E_{HONO} = EF \times FAR$ .

## Figures

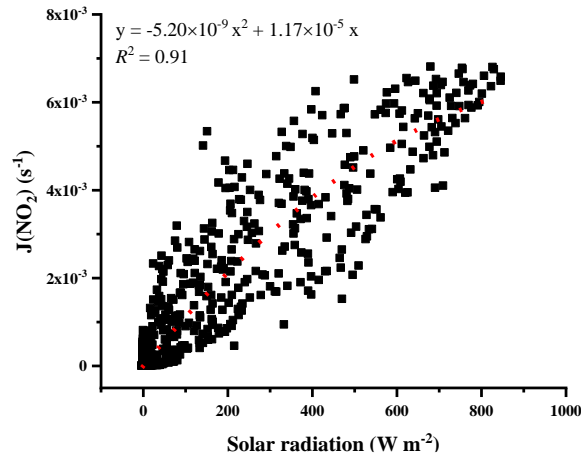

Figure S1. Correlation between the measured  $J(\text{NO}_2)$  and solar radiation (August 28–September 30, 2021).

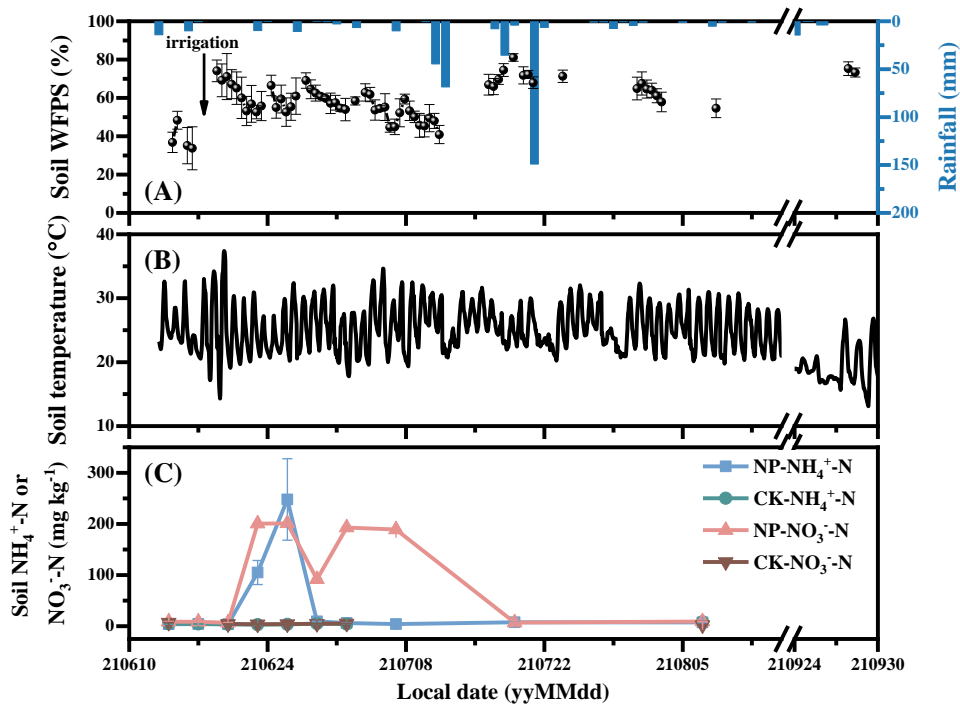

Figure S2. Variations of soil water-filled pore space (WFPS) and rainfall (A), surface soil (5 cm) temperature (B), and concentrations of soil  $\text{NH}_4^+\text{-N}$  and  $\text{NO}_3^-\text{-N}$  from the NP (chemical N fertilizer and normal irrigation), and CK (no fertilization but with normal irrigation) plots (C) during the maize growing season. Error bars represent the standard deviations ( $n=5$  for soil WFPS and 3 for soil  $\text{NH}_4^+\text{-N}$  and  $\text{NO}_3^-\text{-N}$  concentrations).

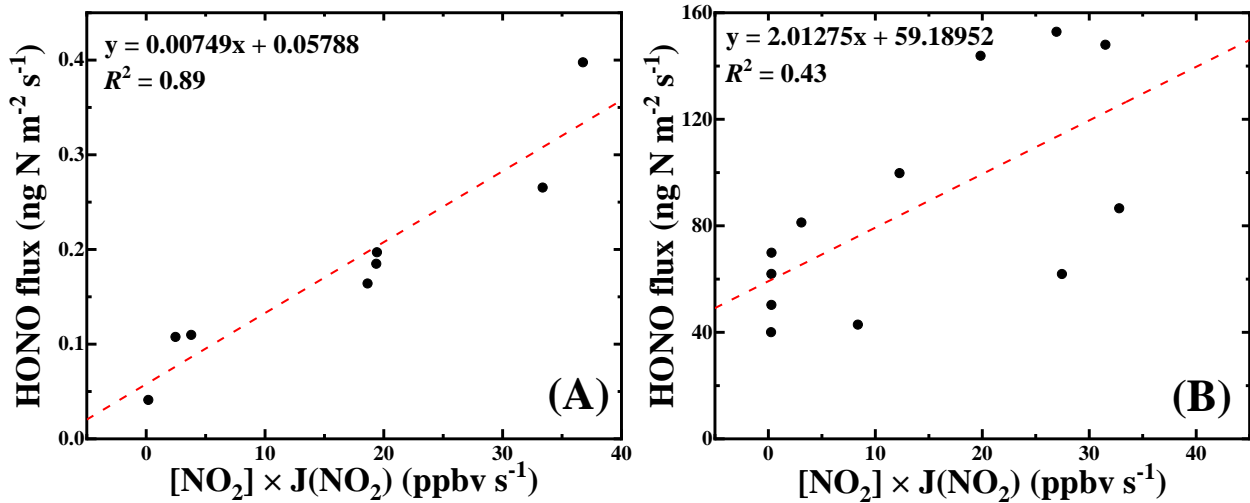

Figure S3. Correlation of the HONO flux with the product  $[\text{NO}_2] \times J(\text{NO}_2)$  during 07:00 to 23:00 UTC, June 16, 2021 (A) and HEP (B). HEP: high HONO emission period.

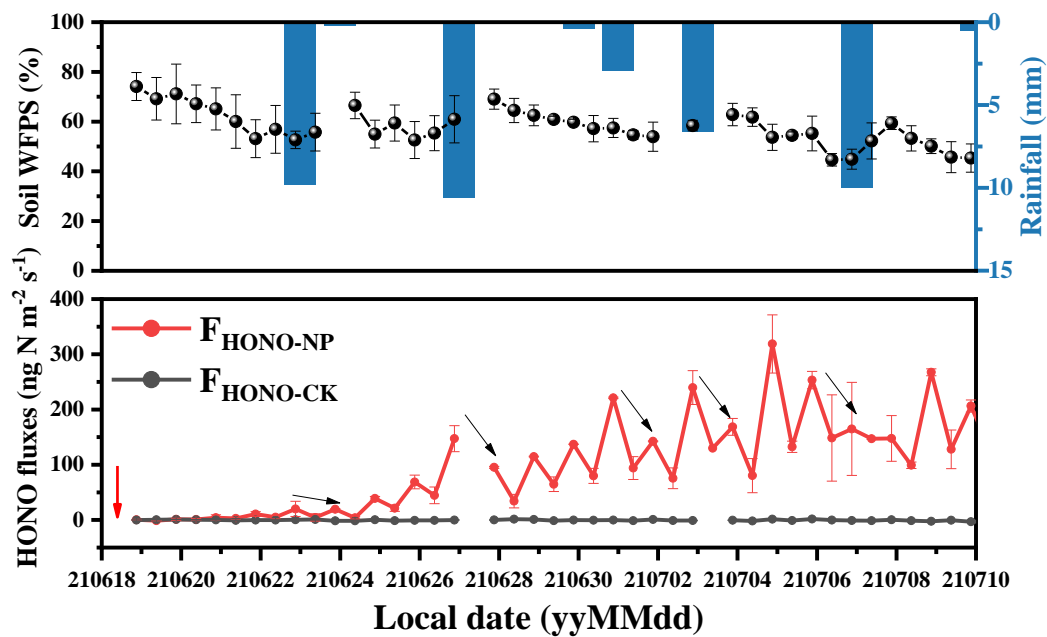

Figure S4. Influence of rainfall on soil HONO emissions and soil water-filled pore space (WFPS). The red arrow represents the fertilization and irrigation. The black arrows indicate reduced HONO fluxes after rain events.

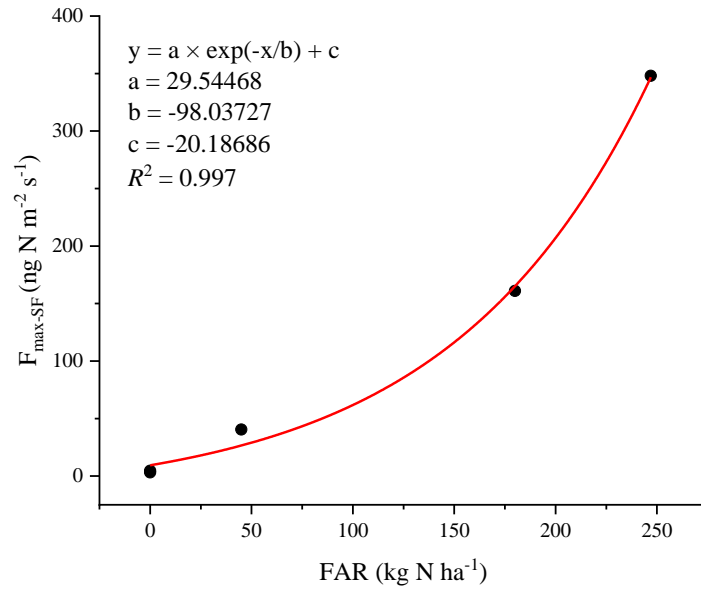

**Figure S5. Correlations of fertilization application rates (FAR) and maximum HONO flux under surface fertilization ( $F_{\max-SF}$ ).**

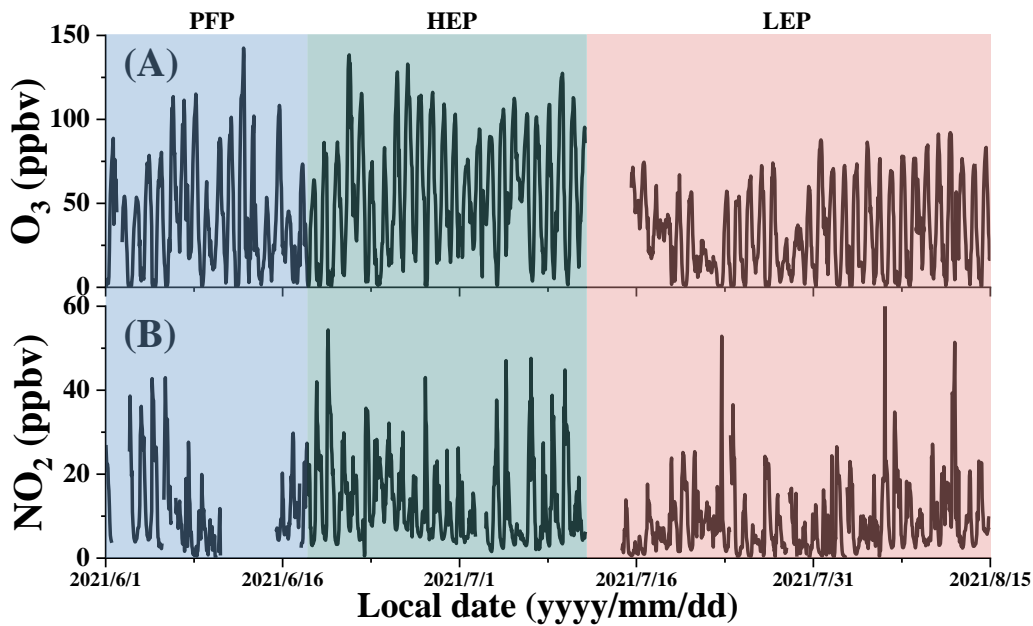

**Figure S6. Time series of atmospheric  $O_3$  (A) and  $NO_2$  (B) concentrations at the observation site from June 1 to August 15, 2021. PFP: pre-fertilization period, before June 18; HEP: high HONO emission period, from June 18 to July 10; LEP: low HONO emission period, after July 10.**
